# Supplementary material for: Prediction and Experimental Characterization of nsSNPs Altering Human PDZ-Binding Motifs
Source: PLoS One. 2014 Apr 10;9(4):e94507. doi: 10.1371/journal.pone.0094507 (PMC3983204; doi:10.1371/journal.pone.0094507)
Supplement: Table S2 — List of C-terminal sequences with nsSNPs modifying one single amino acid and predicted to disrupt or create PDZ binding motifs. (XLS) [file pone.0094507.s002.xls]

## Sheet: TableS1.txt
PDZ_domain	PDZ_EntrezID	PDZ-motif_containing_Cterminus	Disrupted_Cterminus	Predicted_interactor	Modified_form	EntrezID	RefSeqID	RefSeqID	PWM_score[>Tmax]	PWM_score[<Tmin]	SNP_position	Protein_Length	dbSNP
DLG1-2	1739	WDHETIV	WDHETIA	TMEM215	TMEM215_SNP1	401498	NP_997723	NP_997723_SNP1	-6.16864	-9.34891	234	235	dbSNP:201457968
DLG1-2	1739	LRVETDV	LRVEMDV	ARHGEF16	ARHGEF16_SNP2	27237	NP_055263	NP_055263_SNP2	-5.57164	-8.70636	706	709	dbSNP:376620856
DLG1-2	1739	LRKETRV	LRKEARV	CYSLTR2	CYSLTR2_SNP0	57105	NP_065110	NP_065110_SNP0	-5.43463	-8.56935	343	346	dbSNP:201543307
DLG1-2	1739	GGRQSVV	GGRQSVM	PRR5	PRR5_SNP1	55615	NP_056181	NP_056181_SNP1	-5.94816	-9.12844	378	379	dbSNP:113976744
DLG1-2	1739	NLRETDI	NLLETDI	ADRA1D	ADRA1D_SNP0	146	NP_000669	NP_000669_SNP0	-6.25063	-8.66746	567	572	dbSNP:143506323
DLG1-3	1739	LRKEPSL	LRKEPIL	TACSTD2	TACSTD2_SNP1	4070	NP_002344	NP_002344_SNP1	-6.20191	-8.35798	321	323	dbSNP:78554706
DLG2-3	1740	GFFTTRI	GFFTKRI	ALS2CR11_SNP0	ALS2CR11	151254	NP_001161688_SNP0	NP_001161688	-6.35336	-8.7044	392	395	dbSNP:370218775
DLG3-2	1741	ETIETTV	ETIEMTV	C3orf70	C3orf70_SNP0	285382	NP_001020437	NP_001020437_SNP0	-5.91961	-8.65966	247	250	dbSNP:184467596
DLG3-2	1741	GGRQSVV	GGQQSVV	PRR5	PRR5_SNP0	55615	NP_056181	NP_056181_SNP0	-6.31528	-8.31319	374	379	dbSNP:143320954
DLG3-2	1741	GGRQSVV	GGRQSVM	PRR5	PRR5_SNP1	55615	NP_056181	NP_056181_SNP1	-6.31528	-9.39166	378	379	dbSNP:113976744
DLG3-2	1741	GHTSTTV	GHTSTTL	IL8RB_SNP1	IL8RB	3579	NP_001548_SNP1	NP_001548	-5.77576	-8.85214	359	360	dbSNP:373447323
DLG3-2	1741	VTVETVV	VTVETVI	MAS1	MAS1_SNP1	4142	NP_002368	NP_002368_SNP1	-6.3169	-9.39328	324	325	dbSNP:149048594
DLG3-2	1741	IKTETTV	IKTEATV	RASSF6	RASSF6_SNP1	166824	NP_803876	NP_803876_SNP1	-5.70827	-8.44833	334	337	dbSNP:188163946
DLG4-3	1742	EHSTTSV	EHSTTYV	RSBN1	RSBN1_SNP0	54665	NP_060834	NP_060834_SNP0	-6.20319	-8.46658	800	802	dbSNP:3211282
DLG4-3	1742	SELETSV	SELETNV	SLC1A7_SNP0	SLC1A7	6512	NP_006662_SNP0	NP_006662	-6.05001	-8.3134	558	560	dbSNP:368205330
DLG4-3	1742	LRKEPSL	LRKEPIL	TACSTD2	TACSTD2_SNP1	4070	NP_002344	NP_002344_SNP1	-6.10184	-8.36523	321	323	dbSNP:78554706
ERBB2IP-1	55914	GSPDSWV	GSPDSWM	PKP4	PKP4_SNP0	8502	NP_003619	NP_003619_SNP0	-5.38821	-8.78258	1191	1192	dbSNP:141694864
HTRA3-1	94031	GDLGAWV	GDLGARV	TMEM200B_SNP1	TMEM200B	399474	NP_001003682_SNP1	NP_001003682	-6.25535	-9.98706	305	307	dbSNP:144925228
HTRA3-1	94031	SSPGTWT	SSPGTRT	TGFBRAP1_SNP2	TGFBRAP1	9392	NP_004248_SNP2	NP_004248	-4.89022	-8.62194	858	860	dbSNP:201487682
HTRA3-1	94031	SSGGSWT	SSGGSRT	FGFR3_SNP0	FGFR3	2261	NP_000133_SNP0	NP_000133	-6.35199	-10.0837	804	806	dbSNP:369758941
INADL-2	10207	SRREWYV	SRREWYI	PVRL3	PVRL3_SNP0	25945	NP_056295	NP_056295_SNP0	-6.09341	-8.30029	548	549	dbSNP:143220633
MAGI1-3	9223	LRKETRV	LRKEARV	CYSLTR2	CYSLTR2_SNP0	57105	NP_065110	NP_065110_SNP0	-6.39143	-9.57719	343	346	dbSNP:201543307
MAGI1-3	9223	SKNGTLV	SKNGPLV	C11orf52	C11orf52_SNP1	91894	NP_542390	NP_542390_SNP1	-6.13128	-9.31705	120	123	dbSNP:370615884
MAGI1-3	9223	HRSPSLL	HHSPSLL	AGAP3	AGAP3_SNP0	116988	NP_114152	NP_114152_SNP0	-5.96687	-8.91101	905	911	dbSNP:117071005
MAGI1-5	9223	NARVLDV	NARVLHV	ZMYM5	ZMYM5_SNP2	9205	NP_001034739	NP_001034739_SNP2	-6.12486	-9.20015	380	382	dbSNP:143711234
MAGI3-4	260425	SGWDIDF	SGLDIDF	PRKG1	PRKG1_SNP1	5592	NP_001091982	NP_001091982_SNP1	-5.27649	-8.87379	666	671	dbSNP:201962623
MPDZ-10	8777	SARSTDV	SARSTDM	ANO9	ANO9_SNP0	338440	NP_001012302	NP_001012302_SNP0	-6.12442	-9.11063	781	782	dbSNP:139951213
MPDZ-10	8777	SRSPSDV	SRSPSEV	GPR3	GPR3_SNP2	2827	NP_005272	NP_005272_SNP2	-6.34426	-8.9467	328	330	dbSNP:199887450
MPDZ-12	8777	SWFATRV	SWFATRA	HINFP	HINFP_SNP0	25988	NP_001230188	NP_001230188_SNP0	-5.90757	-8.71871	418	419	dbSNP:200316877
MPDZ-13	8777	ATLSSRV	ATLSSRA	PDLIM2_SNP1	PDLIM2	64236	NP_067643_SNP1	NP_067643	-5.63701	-8.6535	601	602	dbSNP:145349678
MPDZ-2	8777	VLGLLWL	VLGLLRL	C22orf42_SNP0	C22orf42	150297	NP_001010859_SNP0	NP_001010859	-6.39856	-9.50895	249	251	dbSNP:373116952
MPDZ-2	8777	YVRFWWL	YVRFWCL	SEC22B	SEC22B_SNP0	9554	NP_004883	NP_004883_SNP0	-5.95295	-9.06334	213	215	dbSNP:7534444
MPDZ-3	8777	STRLFYL	STRLSYL	PIWIL3	PIWIL3_SNP3	440822	NP_001008496	NP_001008496_SNP3	-6.06751	-8.35784	879	882	dbSNP:61733495
MPDZ-4	8777	RSFLGPI	RSFLSPI	FAM120AOS_SNP0	FAM120AOS	158293	NP_942138_SNP0	NP_942138	-6.17579	-8.5901	253	256	dbSNP:201308688
MPDZ-5	8777	SRREWYV	SRREWYI	PVRL3	PVRL3_SNP0	25945	NP_056295	NP_056295_SNP0	-6.2191	-9.00118	548	549	dbSNP:143220633
MPDZ-7	8777	QHFWTRL	QHFWARL	ATP13A5_SNP0	ATP13A5	344905	NP_940907_SNP0	NP_940907	-6.14384	-9.22023	1215	1218	dbSNP:145659956
MPDZ-7	8777	LRKETRV	LRKEARV	CYSLTR2	CYSLTR2_SNP0	57105	NP_065110	NP_065110_SNP0	-6.12404	-9.20042	343	346	dbSNP:201543307
MPP6-1	51678	SGQEYSL	SGQEYSV	KCTD3	KCTD3_SNP1	51133	NP_057205	NP_057205_SNP1	-6.22072	-8.73578	814	815	dbSNP:200120296
PDLIM4-1	8572	RSESPWK	RSESLWK	DICER1_SNP0	DICER1	23405	NP_001182502_SNP0	NP_001182502	-5.86202	-8.58372	1826	1829	dbSNP:199574382
PDZK1-1	5174	SVSSTSL	SVSSPSL	KLHL17	KLHL17_SNP0	339451	NP_938073	NP_938073_SNP0	-6.15231	-9.05421	639	642	dbSNP:188543688
PDZK1-2	5174	RVEVTQF	RVEVMQF	SLC22A9	SLC22A9_SNP1	114571	NP_543142	NP_543142_SNP1	-6.39437	-8.38929	550	553	dbSNP:142543443
PDZK1-2	5174	ERKLTRF	ERKLTRL	SLC17A3_SNP3	SLC17A3	10786	NP_006623_SNP3	NP_006623	-6.37061	-8.51722	419	420	dbSNP:377397851
PSCDBP-1	9595	HLKRRWF	HLKRRRF	CCDC152_SNP2	CCDC152	100129792	NP_001128320_SNP2	NP_001128320	-5.90709	-9.66747	252	254	dbSNP:371676758
PTPN13-2	5783	WDHETIV	WDHETIA	TMEM215	TMEM215_SNP1	401498	NP_997723	NP_997723_SNP1	-5.96789	-8.72227	234	235	dbSNP:201457968
PTPN13-2	5783	YDFTLDV	YDFTLDD	CWF19L1_SNP0	CWF19L1	55280	NP_060764_SNP0	NP_060764	-5.81524	-8.56962	537	538	dbSNP:369913294
PTPN13-2	5783	AQESSLV	AQESGLV	ABCC6_SNP0	ABCC6	368	NP_001162_SNP0	NP_001162	-6.10973	-8.50959	1500	1503	dbSNP:63750874
SCRIB-1	23513	GEKETHL	GEKQTHL	SLC6A12	SLC6A12_SNP1	6539	NP_001193860	NP_001193860_SNP1	-6.22756	-9.40837	610	614	dbSNP:147574089
SCRIB-1	23513	GEKETHL	GEKETPL	SLC6A12	SLC6A12_SNP2	6539	NP_001193860	NP_001193860_SNP2	-6.22756	-8.47364	612	614	dbSNP:372692550
SCRIB-1	23513	GEKETHL	GEKETYL	SLC6A12	SLC6A12_SNP3	6539	NP_001193860	NP_001193860_SNP3	-6.22756	-8.47364	612	614	dbSNP:377289819
SCRIB-2	23513	NLRETDV	NLRETDI	ADRA1D_SNP1	ADRA1D	146	NP_000669_SNP1	NP_000669	-5.95753	-8.90001	571	572	dbSNP:377667322
SCRIB-3	23513	TIFETAL	TIFKTAL	ABCC4	ABCC4_SNP0	10257	NP_005836	NP_005836_SNP0	-5.65684	-8.86965	1321	1325	dbSNP:147926143
SCRIB-3	23513	DSLSTDL	DSLSMDL	DOCK2	DOCK2_SNP0	1794	NP_004937	NP_004937_SNP0	-6.38663	-9.92266	1827	1830	dbSNP:202005409
SHANK3-1	85358	YLIHTRF	YLIHMRF	OR52E2	OR52E2_SNP0	119678	NP_001005164	NP_001005164_SNP0	-5.58307	-8.99876	322	325	dbSNP:141739672
SHANK3-1	85358	SVSSTSL	SVSSPSL	KLHL17	KLHL17_SNP0	339451	NP_938073	NP_938073_SNP0	-5.71731	-9.133	639	642	dbSNP:188543688
SHANK3-1	85358	TFTVTSL	TFTVISL	AHDC1	AHDC1_SNP0	27245	NP_001025053	NP_001025053_SNP0	-6.37431	-9.79001	1600	1603	dbSNP:150494865
SHANK3-1	85358	STTRSRF	STTGSRF	KRT38_SNP0	KRT38	8687	NP_006762_SNP0	NP_006762	-6.26314	-8.49234	452	456	dbSNP:148086126
SHANK3-1	85358	YLHPTRF	YLHPTQF	THEG5	THEG5_SNP0	100507527	NP_001192202	NP_001192202_SNP0	-6.13108	-8.76051	146	148	dbSNP:191374797
SHANK3-1	85358	RDPVTRL	RDPVARL	C6orf221	C6orf221_SNP1	154288	NP_001017361	NP_001017361_SNP1	-6.31782	-9.73351	214	217	dbSNP:376848709
SLC9A3R2-2	9351	VNGDTRL	VNGDNRL	PLCG1_SNP0	PLCG1	5335	NP_877963_SNP0	NP_877963	-5.51159	-8.58227	1287	1290	dbSNP:373750429
TJP1-3	7082	LWTPRWL	LWTPRCL	ATXN7_SNP0	ATXN7	6314	NP_001170858_SNP0	NP_001170858	-5.59284	-8.78615	943	945	dbSNP:201478726
TJP1-3	7082	LDFTNWL	LDFTNWF	ASCL1_SNP0	ASCL1	429	NP_004307_SNP0	NP_004307	-6.34479	-9.11243	235	236	dbSNP:11111420
